# Supplementary material
Source: PubMed Central journal article supplement (PMC2947919)
Supplement: 1007773107_pnas.201007773SI.pdf [file 1007773107_pnas.201007773SI.pdf]

# Supporting Information

Gil-Humanes et al. 10.1073/pnas.1007773107

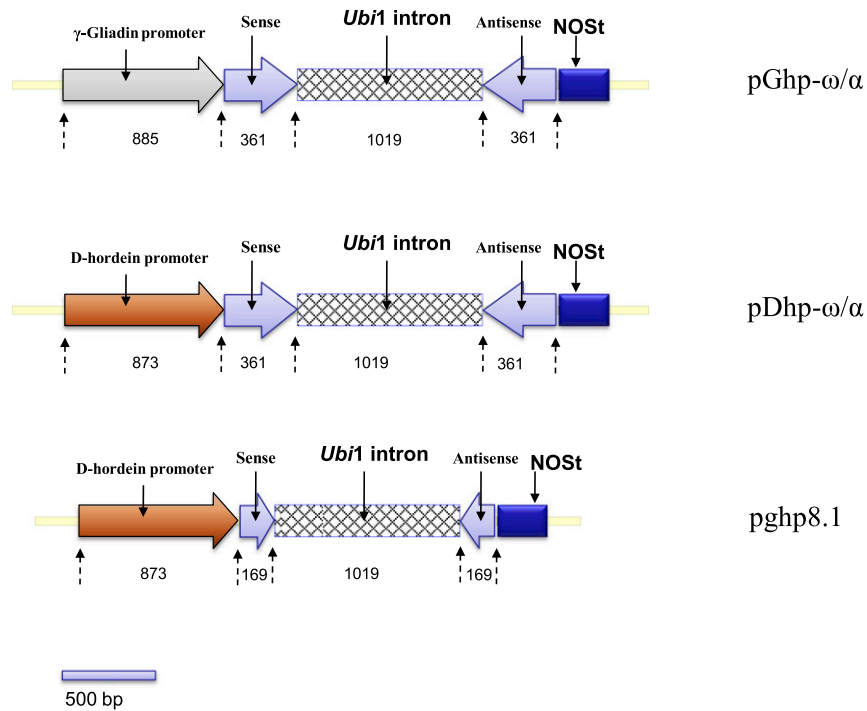

**Fig. S1.** Constructs for RNAi-targeting gliadin genes. The vectors contain a  $\gamma$ -gliadin (pGhp- $\omega/\alpha$ ) or D-hordein promoter (pDhp- $\omega/\alpha$  and pghp8.1), the *nos* terminator sequence (NOS), and the triggered repeat sequences in sense and antisense orientations separated by the *Ubiquitin 1* intron (*Ubi1* intron). Vectors pGhp- $\omega/\alpha$  and pDhp- $\omega/\alpha$  include an inverted repeat (IR) chimeric 361-bp fragment from  $\alpha$ - and  $\omega$ -gliadins. Vector pghp8.1 includes a 169-bp IR fragment from  $\gamma$ -gliadin. Numbers indicate length in base pairs.

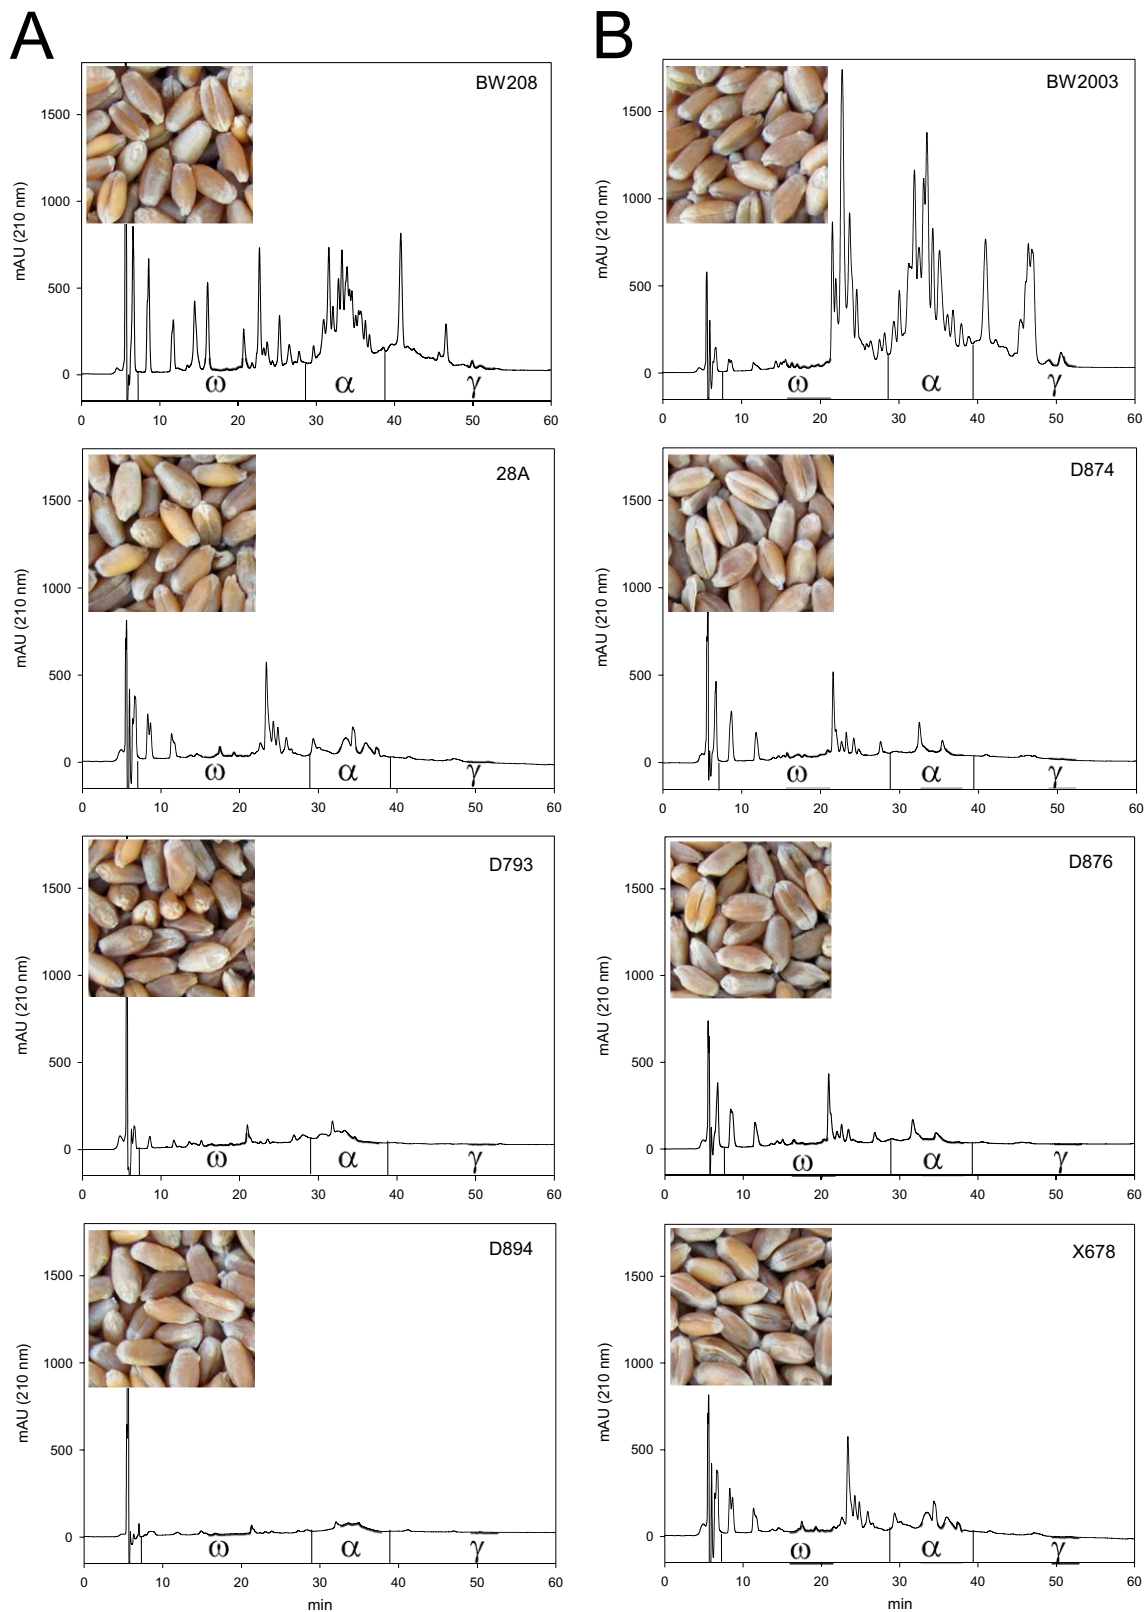

**Fig. S2.** RP-HPLC chromatograms of gliadin extracts from wild-type and transgenic wheat lines. (A) BW208 wild-type and BW208 transgenic lines. (B) BW2003 wild-type and BW2003 transgenic lines.  $\omega$ ,  $\omega$ -gliadins;  $\alpha$ ,  $\alpha$ -gliadins;  $\gamma$ ,  $\gamma$ -gliadins. mAU (210 nm), milliunits of absorbance at 210 nm; min, retention time in minutes.

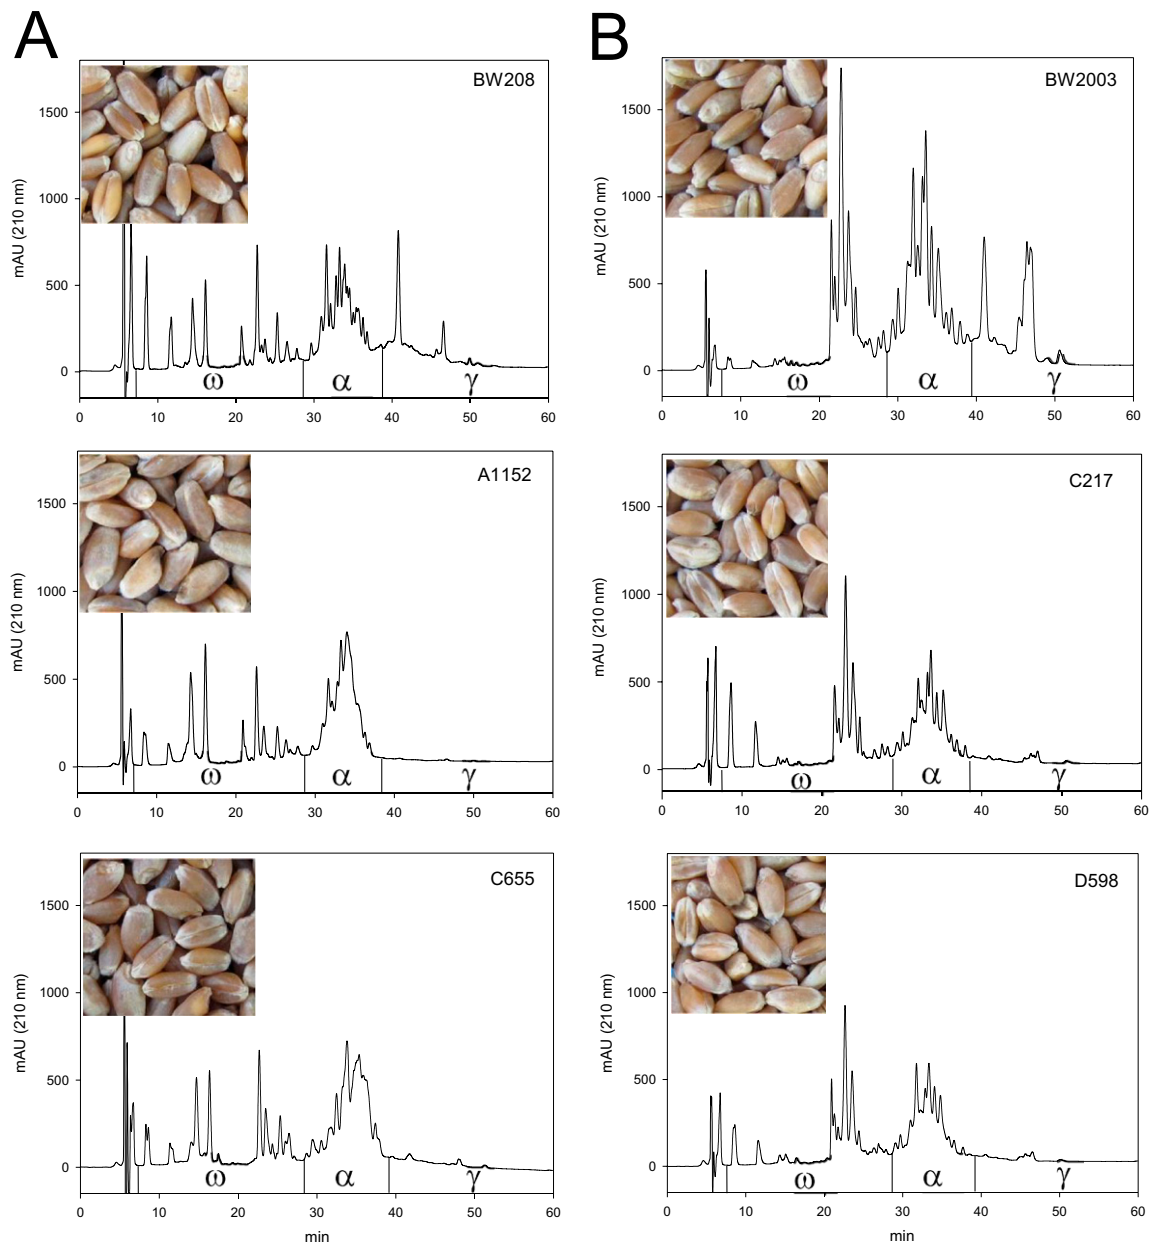

**Fig. S3.** RP-HPLC chromatograms of gliadin extracts from wild-type and transgenic wheat lines transformed with pghp8.1 construct. (A) BW208 wild-type and BW208 transgenic lines. (B) BW2003 wild-type and BW2003 transgenic lines. Names and symbols are as described in Fig. S2.

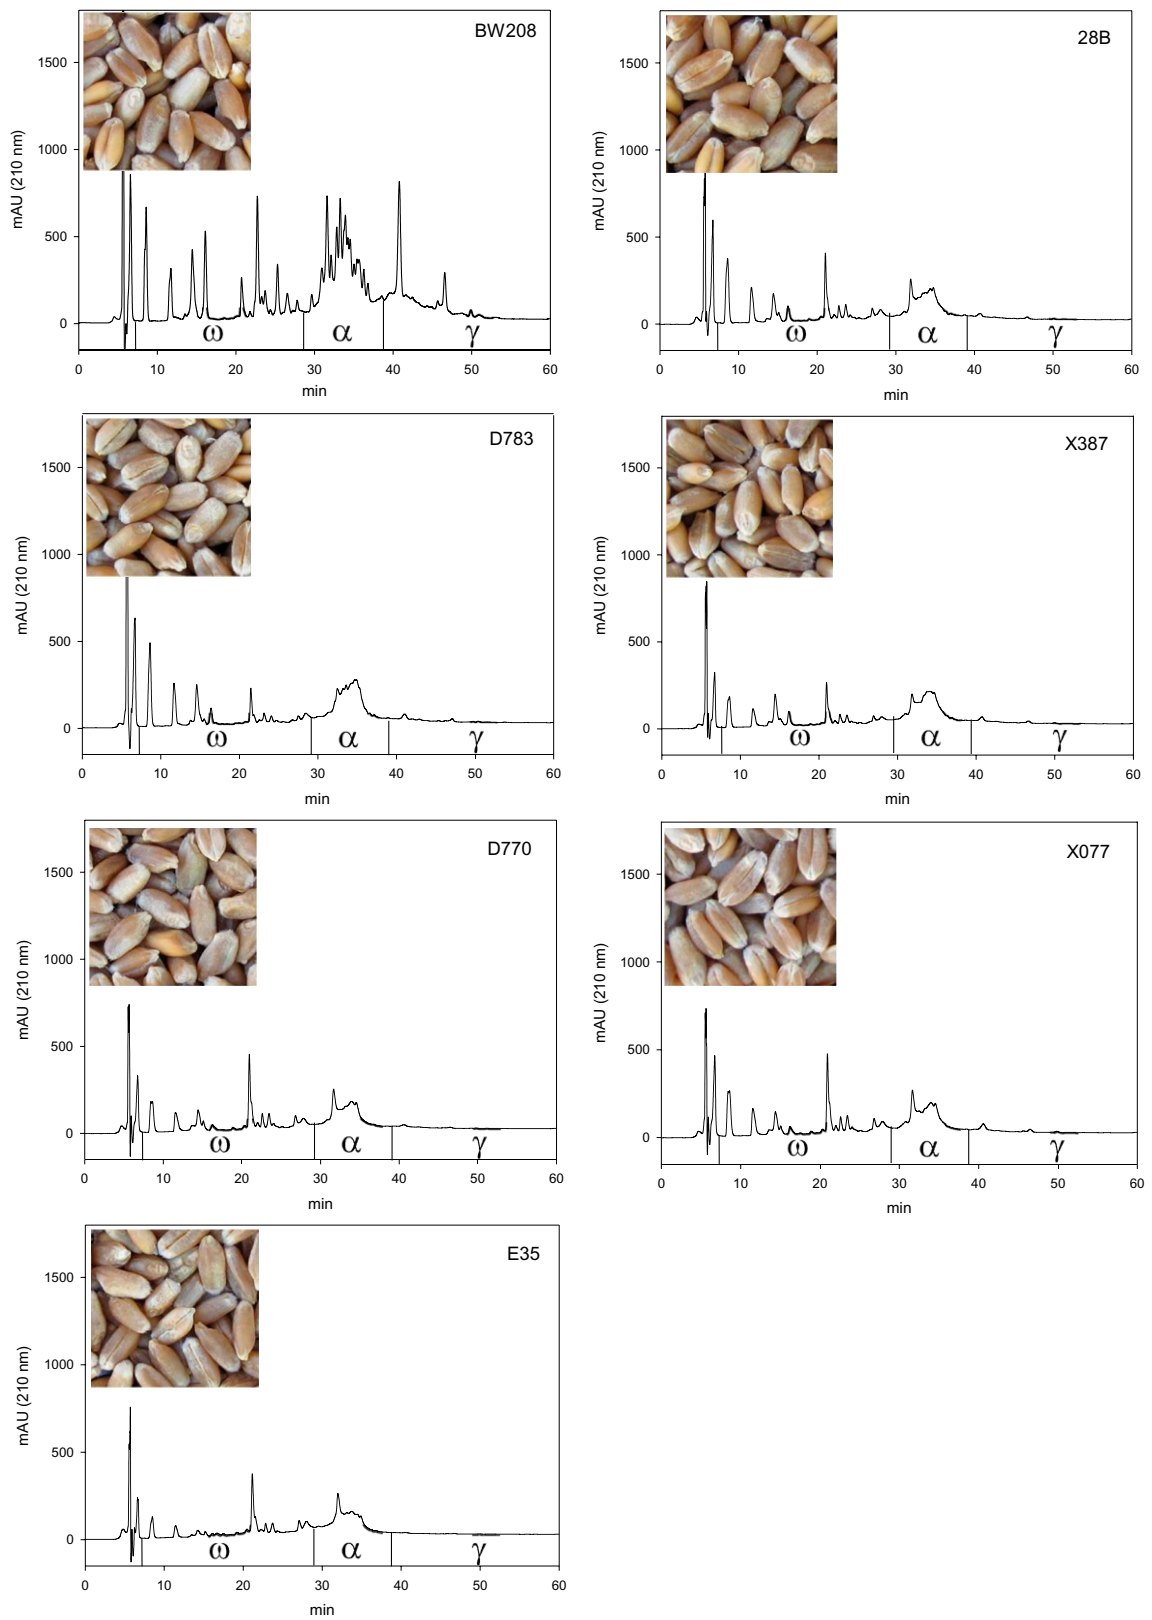

**Fig. S4.** RP-HPLC chromatograms of gliadin extracts from wild-type and transgenic wheat lines. BW208 wild type and BW208 transformed with vectors pDhp- $\omega/\alpha$ , pGhp- $\omega/\alpha$ , and pghp8.1+pDhp- $\omega/\alpha$ . Names and symbols are as described in Fig. S2.

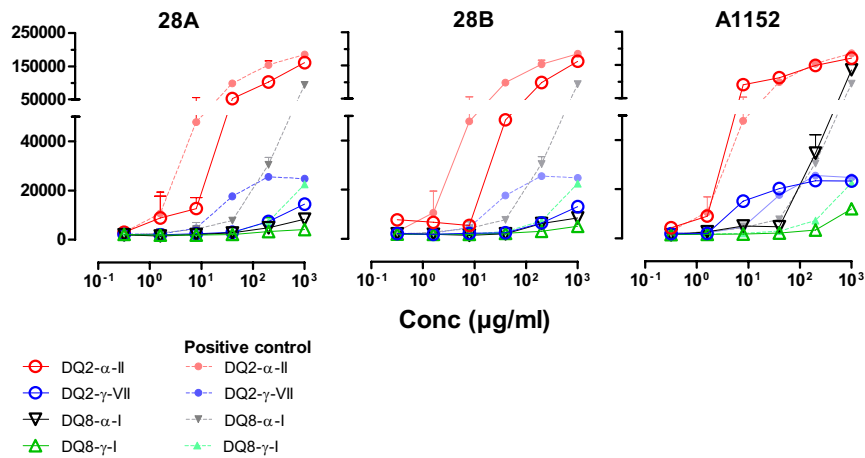

Fig. S5. Proliferative responses of gliadin-specific T-cell clones stimulated with total gluten extracts from transgenic wheat lines derived from the BW208 line. These lines gave significantly reduced T-cell proliferation compared with the wild-type line. Symbols are as described in Fig. 2.

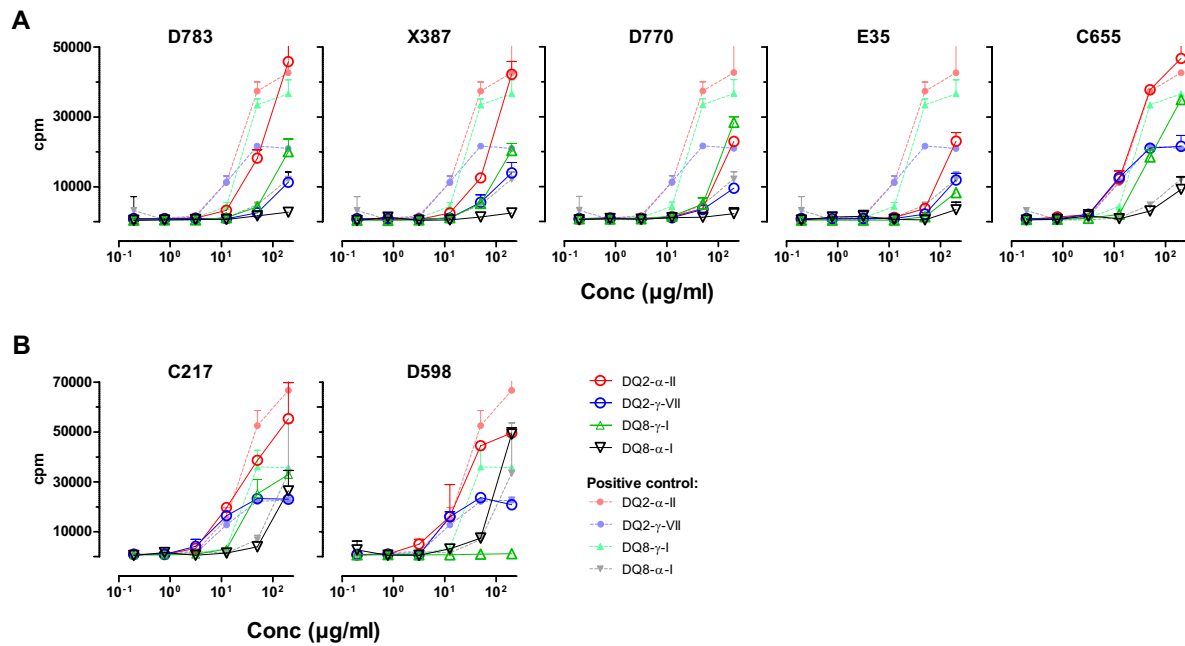

Fig. S6. Proliferative responses of gliadin-specific T-cell clones stimulated with total gluten extracts from transgenic wheat lines. These lines gave no or very little reduction in the T-cell response compared with the wild-type lines. Transgenic lines derived from line BW208 are depicted in A, whereas transgenic lines derived from BW2003 are depicted in B. Symbols are as described in Fig. 2.

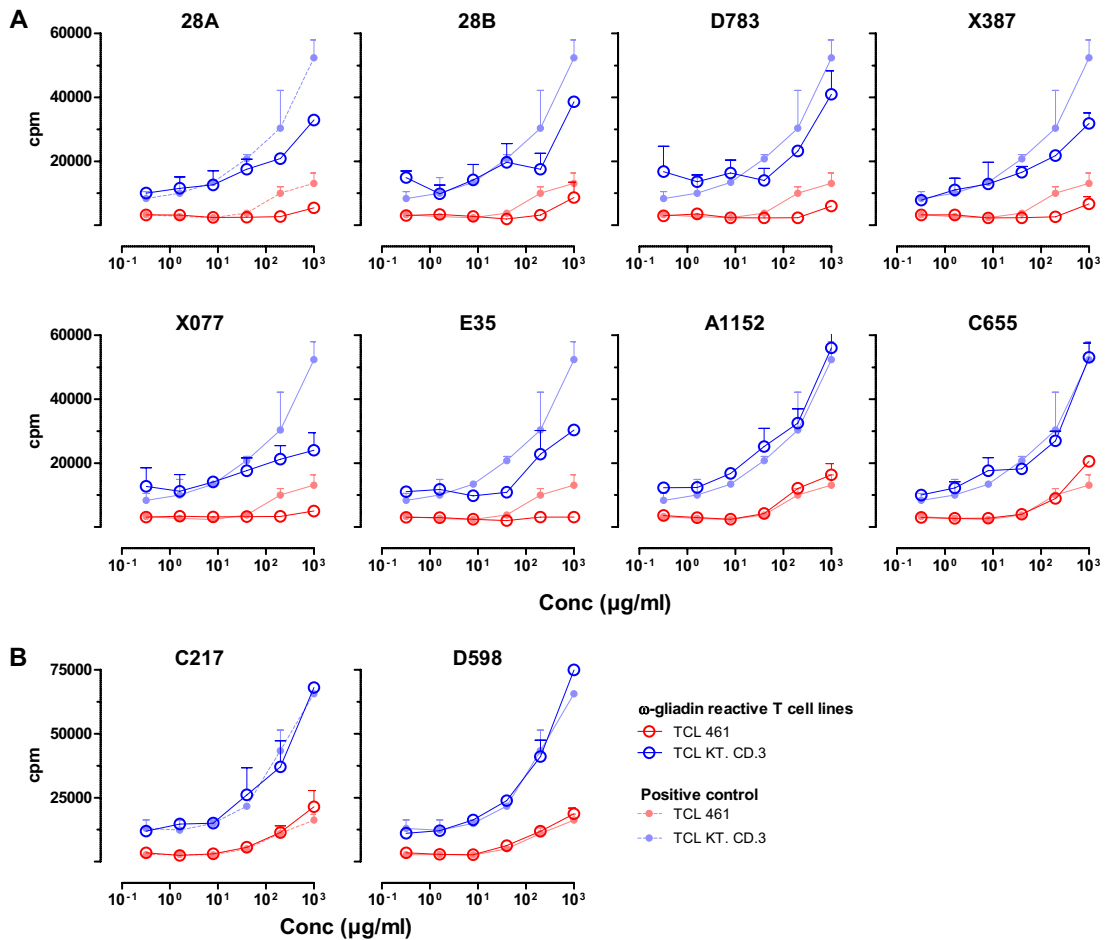

**Fig. S7.** Proliferative responses of  $\omega$ -gliadin reactive T-cell lines stimulated with total gluten extracts from transgenic wheat lines. Transgenic lines derived from line BW208 are depicted in *A*, whereas transgenic lines derived from BW2003 are depicted in *B*. Symbols are as described in Fig. 3.

**Table S1. *Triticum aestivum* gliadin accession number from the nucleotide GenBank nonredundant (nr) database (<http://www.ncbi.nlm.nih.gov/Genbank/>)**

| $\alpha$ - | $\gamma$ - | $\omega$ - |
|------------|------------|------------|
| AJ130948   | AF120267   | AF280605   |
| AJ133602   | AF144104   | AF280606   |
| AJ133603   | AF234642   | AB059812   |
| AJ133604   | AF234643   | AY591334   |
| AJ133605   | AF234644   | AJ937839   |
| AJ133606   | AF234645   | AB181300   |
| AJ133607   | AF234646   | AB181301   |
| AJ133608   | AF234647   | DQ287981   |
| AJ133609   | AF234648   | DQ307378   |
| AJ133610   | AF234649   | EF116277   |
| AJ133611   | AF234650   | EF116278   |
| AJ133612   | AF234651   | FJ598069   |
| AY293730   | AF419255   | FJ598070   |
| AY496057   | AJ389666   | FJ598071   |
| D84341     | AJ389667   | FJ598072   |
| DQ234066   | AJ389668   | FJ598073   |
| DQ234067   | AJ389669   | FJ598074   |
| DQ246446   | AJ389670   | GQ423428   |
| DQ246447   | AJ389671   | GQ423429   |
| DQ246448   | AJ389672   | GQ423430   |
| DQ246449   | AJ389673   | GQ423431   |
| DQ417343   | AJ389674   | GQ423432   |
| DQ417344   | AJ389675   |            |
| DQ417345   | AJ389676   |            |
| EF165551   | AJ389689   |            |
| EF165552   | AJ389690   |            |
| EF165553   | AJ389691   |            |
| EF561274   | AJ389692   |            |
| EF561275   | AJ389693   |            |
| EF561276   | AJ389694   |            |
| EF561277   | AJ389695   |            |
| EF561278   | AJ389696   |            |
| EF561279   | AJ389697   |            |
| EF561280   | AJ389698   |            |
| EF561281   | AJ416336   |            |
| EF561282   | AJ416337   |            |
| EF561283   | AJ416338   |            |
| EF561284   | AJ416339   |            |
| EF561285   | AY338386   |            |
| EF561286   | AY338387   |            |
| EF561287   | AY338388   |            |
| EF561288   | AY338389   |            |
| EF569971   | AY338390   |            |
| EF569972   | DQ432029   |            |
| EF569973   | DQ432030   |            |
| EF569974   | EF151018   |            |
| EF569975   | EF426565   |            |
| EF569976   | FJ006589   |            |
| EF569977   | FJ006590   |            |
| EF569978   | FJ006591   |            |
| EF569979   | FJ006592   |            |
| EF569980   | FJ006593   |            |
| EF569981   | FJ006594   |            |
| EF569982   | FJ006595   |            |
| EF569983   | FJ006596   |            |
| EF569984   | FJ006597   |            |
| EF569985   | FJ006598   |            |
| EF569986   | FJ006599   |            |
| EU018268   | FJ006600   |            |
| EU018269   | FJ006601   |            |
| EU018270   | FJ006602   |            |

Table S1. Cont.

| $\alpha$ - | $\gamma$ - | $\omega$ - |
|------------|------------|------------|
| EU018271   | FJ006603   |            |
| EU018272   | FJ006604   |            |
| EU018273   | FJ006605   |            |
| EU018274   | FJ006606   |            |
| EU018275   | FJ006607   |            |
| EU018276   | FJ006608   |            |
| EU018277   | FJ006609   |            |
| EU018278   | FJ006610   |            |
| EU018279   | FJ006611   |            |
| EU018280   | FJ006612   |            |
| EU018281   | FJ006613   |            |
| EU018282   | FJ006614   |            |
| EU018283   | FJ006615   |            |
| EU018284   | FJ006616   |            |
| EU018285   | FJ006617   |            |
| EU018286   | FJ006618   |            |
| EU018287   | FJ006619   |            |
| EU018288   | FJ006620   |            |
| EU018289   | FJ006621   |            |
| EU018290   | FJ006622   |            |
| EU018291   | FJ006623   |            |
| EU018292   | FJ006678   |            |
| EU018293   | FJ006679   |            |
| EU018294   | FJ006680   |            |
| EU018295   | FJ006681   |            |
| EU018296   | FJ006682   |            |
| EU018297   | FJ006683   |            |
| EU018298   | FJ040741   |            |
| EU018299   | FJ040742   |            |
| EU680852   | FJ040743   |            |
| EU680853   | FJ040744   |            |
| EU680854   | FJ040745   |            |
| EU680855   | FJ040746   |            |
| FJ478466   | FJ040747   |            |
| FJ478467   | FJ040748   |            |
| FJ478468   | FJ040749   |            |
| FJ595934   | FJ040750   |            |
| FJ595935   | FJ040751   |            |
| GQ891681   | FJ040752   |            |
| GQ891682   | FJ040753   |            |
| GQ891683   | FJ040754   |            |
| GQ891684   | FJ040755   |            |
| GQ891685   | FJ040756   |            |
| GQ891686   | FJ231103   |            |
| GQ891687   | FJ595936   |            |
| U08287     | FJ595937   |            |
| U50984     | GQ857626   |            |
| U51302     | GQ871769   |            |
| U51303     | GQ871770   |            |
| U51304     | GQ871771   |            |
| U51305     | GQ871772   |            |
| U51306     | GQ871773   |            |
| U51307     | GQ871774   |            |
| U51308     | GQ871775   |            |
| U51309     | GQ871776   |            |
| U51310     | GQ871777   |            |
| X54517     | M11077     |            |
| X54688     | M11335     |            |
| X54689     | M11336     |            |
|            | M13712     |            |
|            | M13713     |            |
|            | M16060     |            |
|            | M16064     |            |
|            | M36999     |            |



**Table S2. Average identity of the three RNAi fragments with  $\alpha$ -,  $\gamma$ -, and  $\omega$ -gliadin sequences**

| Construct                 | RNAi fragment | Average identity with gliadin groups (%) |             |             |
|---------------------------|---------------|------------------------------------------|-------------|-------------|
|                           |               | $\alpha$                                 | $\gamma$    | $\omega$    |
| pghp8.1                   | $\gamma$      | 71.9 (4.8)                               | 80.7 (11.4) | 66.6 (1.9)  |
| pGhp- $\omega/\alpha$ and | $\alpha$      | 91.4 (6.1)                               | 69.2 (2.6)  | 60.1 (2.7)  |
| pDhp- $\omega/\alpha$     | $\omega$      | 79.2 (5.5)                               | 69.3 (5.5)  | 75.6 (13.1) |

Each RNAi fragment was compared with gliadin sequences from *T. aestivum* present in the GenBank database as follows: 120  $\alpha$ -gliadin sequences, 125  $\gamma$ -gliadin sequences, and 22  $\omega$ -gliadin sequences. Average values are presented in percentages, and SDs are in brackets. The identity between the IR fragments and the  $\alpha$ -,  $\gamma$ -, and  $\omega$ - gliadin sequences was calculated using Needle and Supermatcher programs (<http://emboss.sourceforge.net/>).

**Table S3. Primers used for the synthesis and detection of the RNAi constructs**

| Primer                                                                              | Description                                                                                                                                        | Sequence 5' to 3'                                       |
|-------------------------------------------------------------------------------------|----------------------------------------------------------------------------------------------------------------------------------------------------|---------------------------------------------------------|
| Synthesis and detection of pGhp- $\omega/\alpha$ and pDhp- $\omega/\alpha$ plasmids |                                                                                                                                                    |                                                         |
| alpha_hp_F                                                                          | Forward primer for the synthesis of the 170-bp $\alpha$ -gliadin fragment                                                                          | CAACAACAACGATTCCATGC                                    |
| alpha_hp_R                                                                          | Reverse primer for the synthesis of the 170-bp $\alpha$ -gliadin fragment                                                                          | AYRACATTRTGGATGGCYTG                                    |
| omega_III_F                                                                         | Forward primer for the synthesis of the 191-bp $\omega$ -gliadin fragment                                                                          | CCTCCTCATCTTTGTCCTCC                                    |
| omega_III_R                                                                         | Reverse primer for the synthesis of the 191-bp $\omega$ -gliadin fragment and detection of the $\omega/\alpha$ hpRNA plasmids in transgenic plants | AAATGGTTGTTGCGATGGATA                                   |
| omega_III_R_overlapping                                                             | Reverse primer for the synthesis of the 361-bp $\omega/\alpha$ RNAi fragment                                                                       | CAGTTGTTGTTGAAATGGTTGTTGCGATGG                          |
| alpha_F_overlapping                                                                 | Forward primer for the synthesis of the 361-bp $\omega/\alpha$ RNAi fragment                                                                       | CAACAACCATTTCACAACAACGATTCCA                            |
| prGli_F+SphI                                                                        | Forward primer for the synthesis of $\gamma$ -gliadin promoter and detection of the pGhp- $\omega/\alpha$ plasmid in transgenic plants             | GAGCATGCTCCAGAAAAAAGTTGCTAATG                           |
| prGli_R+XhoI                                                                        | Reverse primer for amplification of $\gamma$ -gliadin promoter                                                                                     | CGCTCGAGGGTGGATTGCGTAACTACTAC                           |
| pHorD_F+SphI                                                                        | Forward primer for amplification of D-hordein promoter and detection of the pDhp- $\omega/\alpha$ plasmid in transgenic plants                     | GCGCATGCCATTAATTGAACTCATTCCG                            |
| pHorD_R+XhoI                                                                        | Reverse primer for amplification of D-hordein promoter                                                                                             | CGCTCGAGCATCCGACTGTCAATGAATT                            |
| Ubi_F+EcoRV                                                                         | Forward primer for amplification of <i>Ubi1</i> intron                                                                                             | TTGATATCCACCTCCGCTTCAAGGTACG                            |
| Ubi_R+EcoRV                                                                         | Reverse primer for amplification of <i>Ubi1</i> intron                                                                                             | GCGATATCAAGTAACACCAAACAACAGGGTGA                        |
| nost_F+EcoRI                                                                        | Forward primer for amplification of <i>nos</i> terminator                                                                                          | TAGAATTCATCGTTCAAACATTTGGCAATA                          |
| nost_R+EcoRI                                                                        | Reverse primer for amplification of <i>nos</i> terminator                                                                                          | GAATTCTGTTYGACAGCTTATCATCG                              |
| Detection of pghp8.1 plasmid                                                        |                                                                                                                                                    |                                                         |
| prHorD*3                                                                            | Forward primer for detection of pghp8.1 plasmid in transgenic plants                                                                               | GGGGTACCCATTAATTGAACTCATTGCGGAAGC                       |
| Subi_R                                                                              | Reverse primer for detection of pghp8.1 plasmid in transgenic plants                                                                               | GCGTACCTTGAAGCGGAGGTGGTGCAGCTCTAGATTGCAACCAATGATCTGATCG |
| Detection of pAHC25 plasmid                                                         |                                                                                                                                                    |                                                         |
| BAR_F                                                                               | Forward primer for detection of <i>bar</i> gene in transgenic plants                                                                               | GTCTGCACCATCGTCAACC                                     |
| BAR_R                                                                               | Reverse primer for detection of <i>bar</i> gene in transgenic plants                                                                               | GAAGTCCAGCTGCCAGAAAC                                    |
